# Supplementary material
Source: PubMed Central journal article supplement (PMC5962418)
Supplement: NIHMS954443-supplement-1.pdf [file NIHMS954443-supplement-1.pdf]

**Polymerase Bypass of N7-Guanine Monoadducts of Cisplatin, Diepoxybutane, and Epichlorohydrin  
Supplementary Material**

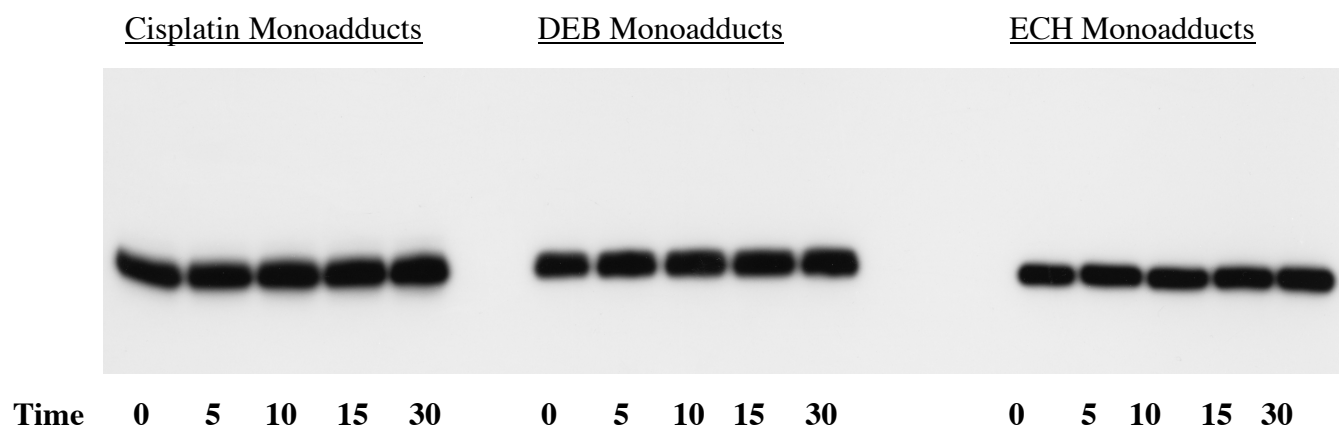

**Figure S1.** Stability of purified monoadducts. Monoadducts were gel-purified, dissolved in TE buffer, and incubated at 50°C. Aliquots were removed at the indicated time points (minutes).

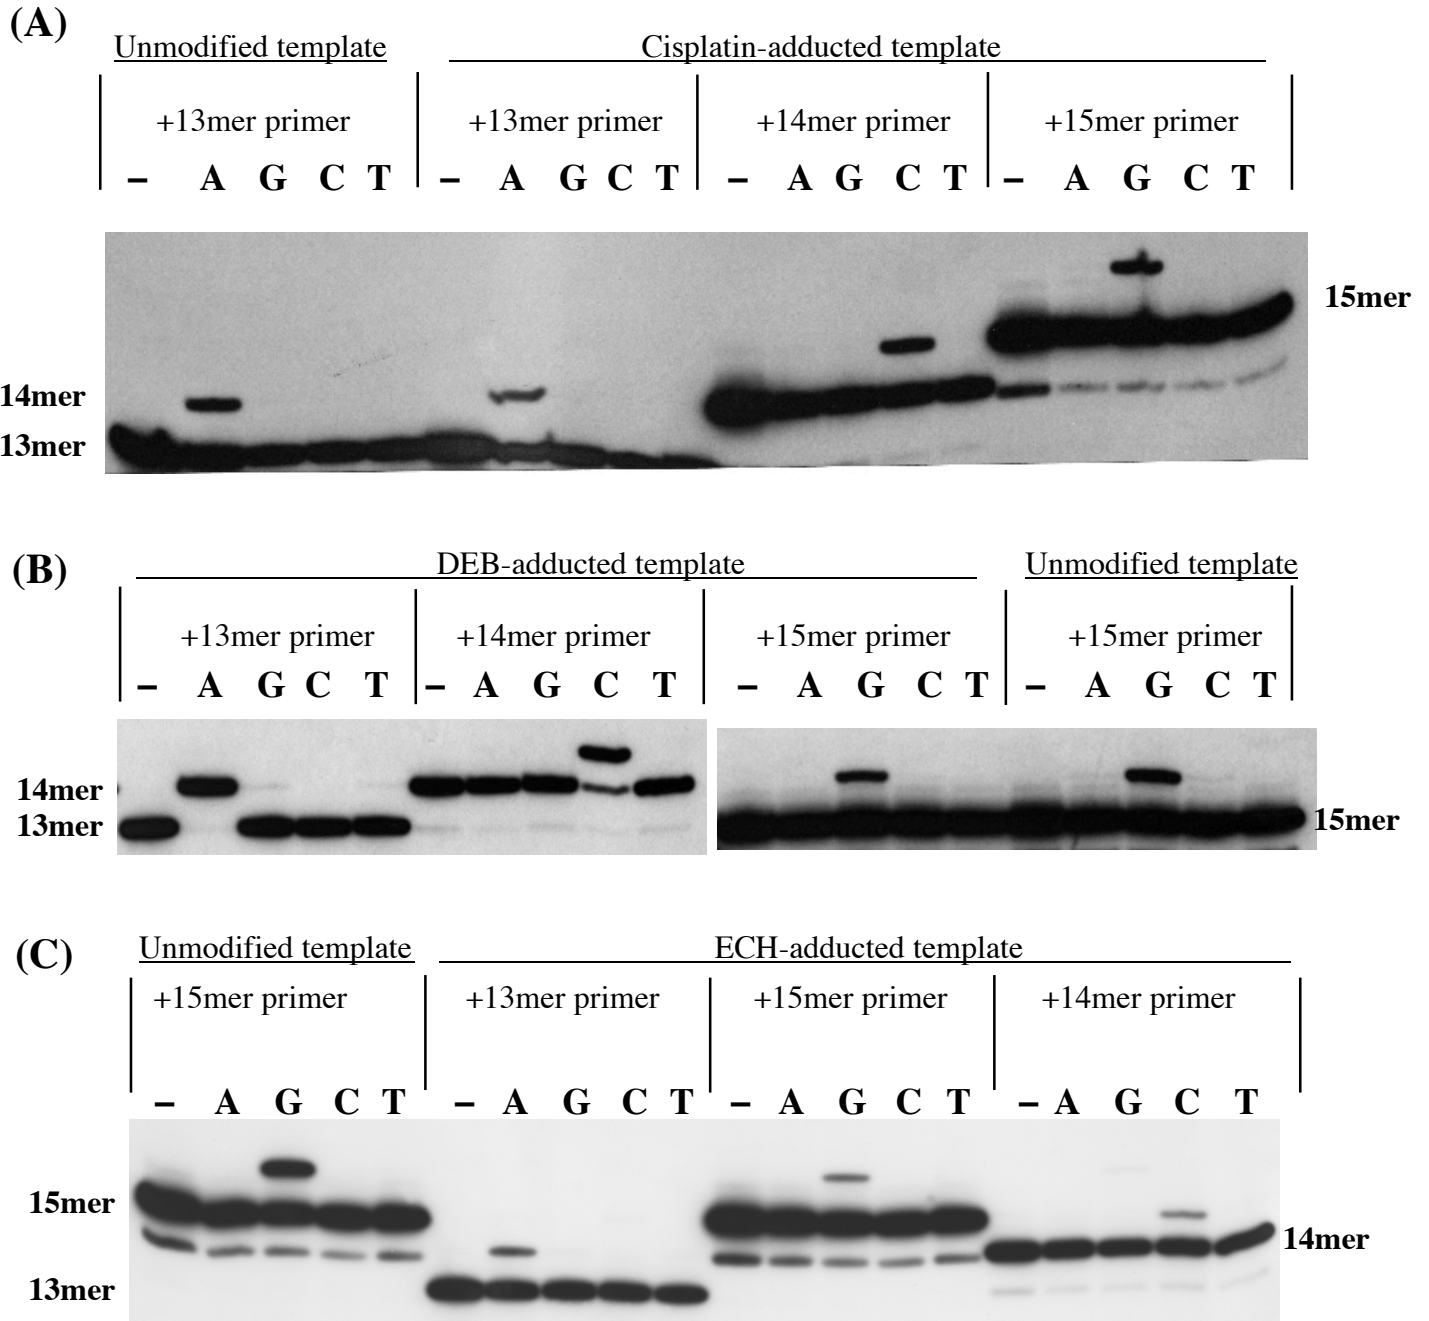

**Figure S2.** Single nucleotide addition with BF. Strand 1, either unmodified or monoadducted, was first annealed with primer. The first lane in each set is the no-dNTP control. The 13mer primer reveals nucleotide addition one nucleotide before the adduct (across from T); the 14mer reflects addition across from the adduct (at G), and the 15mer reflects addition one nucleotide after the adduct (across from C). (A) Cisplatin-adducted template; (B) DEB-adducted template; (C) ECH-adducted template.

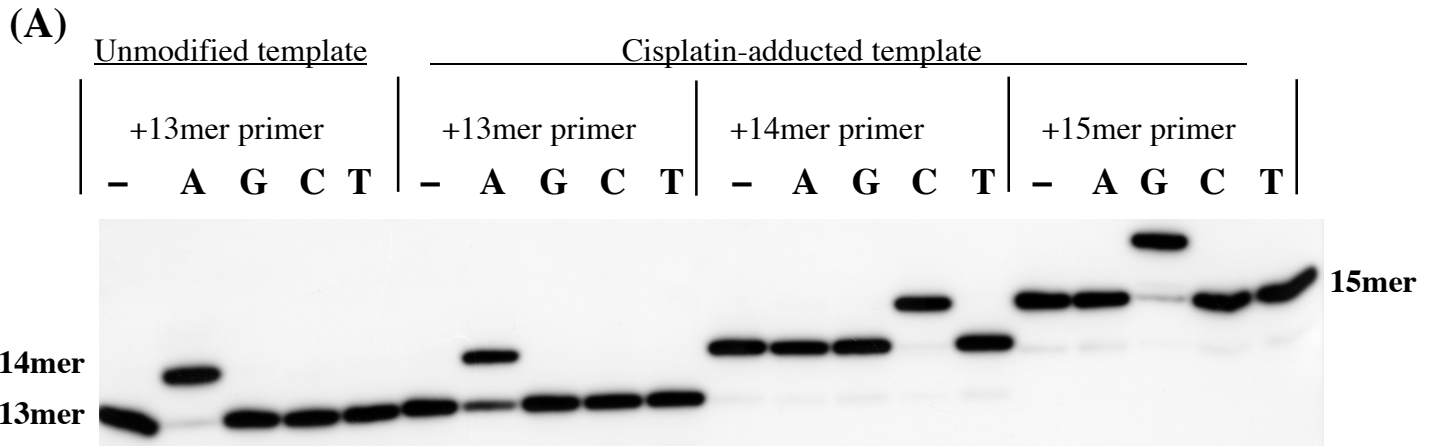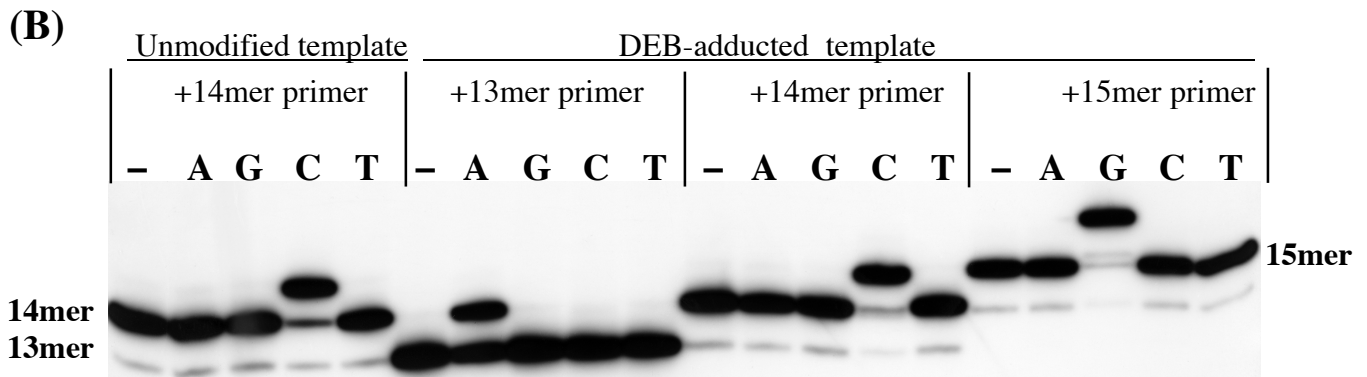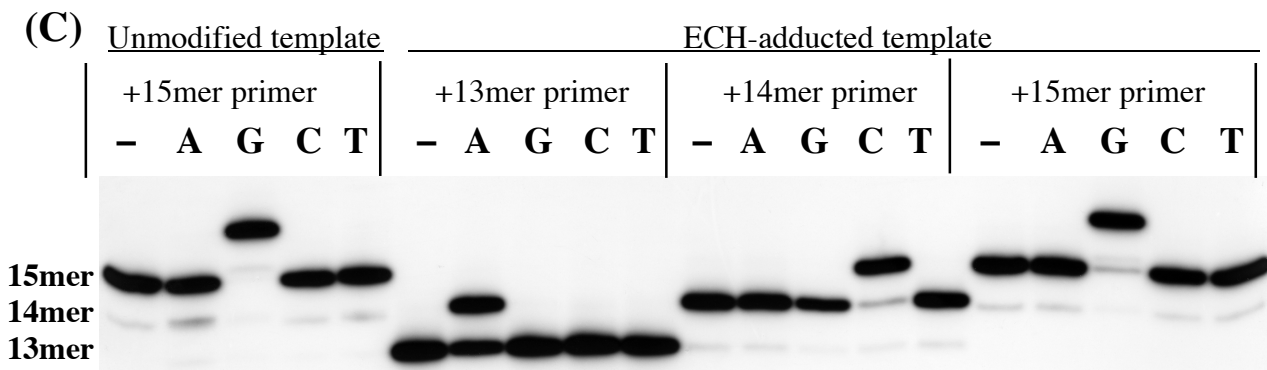

**Figure S3.** Single nucleotide addition with hPol  $\beta$ . Strand 1, either unmodified or monoadducted, was first annealed with primer. The first lane in each set is the no-dNTP control. The 13mer primer reveals nucleotide addition one nucleotide before the adduct (across from T); the 14mer reflects addition across from the adduct (at G), and the 15mer reflects addition one nucleotide after the adduct (across from C). (A) Cisplatin-adducted template; (B) DEB-adducted template; (C) ECH-adducted template.
